# Supplementary material for: Daughter-Specific Transcription Factors Regulate Cell Size Control in Budding Yeast
Source: PLoS Biol. 2009 Oct 20;7(10):e1000221. doi: 10.1371/journal.pbio.1000221 (PMC2756959; doi:10.1371/journal.pbio.1000221)
Supplement: Table S3 — Analysis of Ace2 and Ash1 shared targets. (0.06 MB PDF) [file pbio.1000221.s016.pdf]

| Gene name     | p value in <i>ACE2</i> *-<br><i>ace2</i> dataset | p value in <i>ASH1</i> *-<br><i>ash1</i> dataset | p value in <i>ASH1</i> * <i>ACE2</i> *-<br><i>ash1 ace2</i> dataset (see below) |
|---------------|--------------------------------------------------|--------------------------------------------------|---------------------------------------------------------------------------------|
| <i>CLN3</i>   | 0.02                                             | $4*10^{-4}$                                      | 0.04                                                                            |
| <i>HSP150</i> | 0.001                                            | 0.01                                             | 0.03                                                                            |
| <i>MET6</i>   | $4*10^{-6}$                                      | 0.01                                             | 0.04                                                                            |
| <i>YRF1-1</i> | 0.02                                             | $2*10^{-4}$                                      | 0.04                                                                            |
| <i>YRF1-5</i> | 0.0068                                           | $3*10^{-5}$                                      | 0.03                                                                            |

**Table S3 Analysis of Ace2 and Ash1 shared targets.** We report the p-values that the expression of listed genes is not affected by Ace2 and Ash1. For unknown experimental reasons the error-bars on the *ASH1*\* *ACE2*\*-*ash1 ace2* dataset were on average two times larger than the error-bars on the *ACE2*\*-*ace2* and *ASH1*\*-*ash1* datasets.
